# Supplementary material
Source: publisher figshare collection journal article supplement (https://acs.figshare.com/ndownloader/files/3768124)
Supplement: Supplementary file 1 [file 3768124]

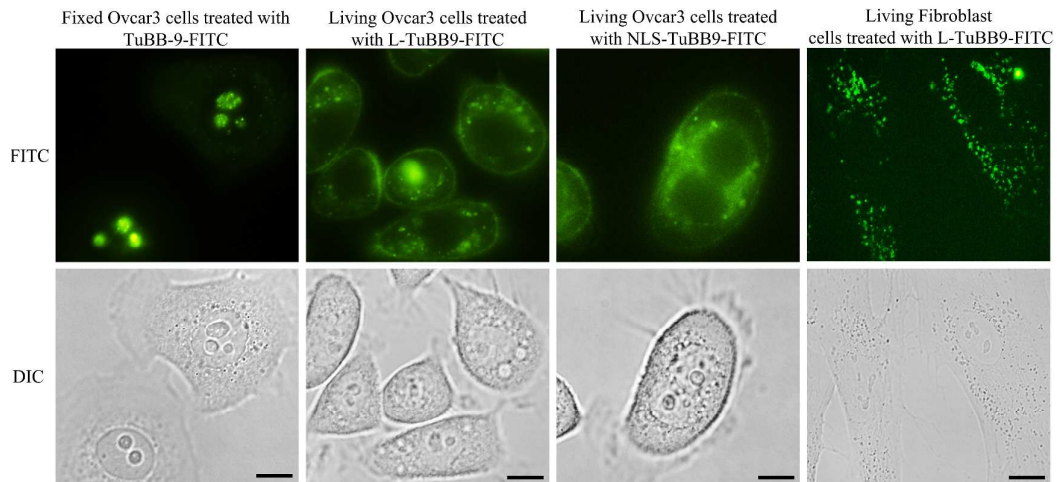

**Supplementary figure S1**

In contrast to immunostaining of fixed Ovar-3 cells (very left panel) no nucleolar localization could be observed, when the cells were incubated for 24 h with L-TuBB-9-FITC and NLS-TuBB-9-FITC. Fibroblast cells (very right panel) also shows no nucleolar localization treated with L-TuBB-9-FITC. Size bars: 10  $\mu$ m.

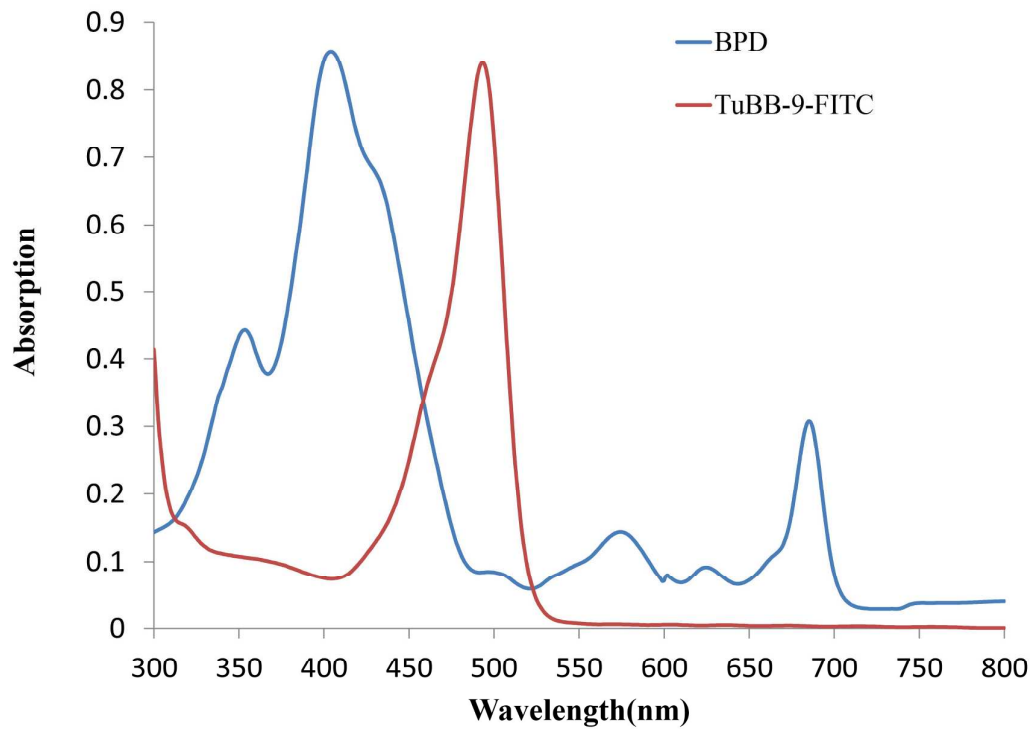

**Supplementary figure S2**

Absorption spectra of TuBB-9-FITC and BPD.

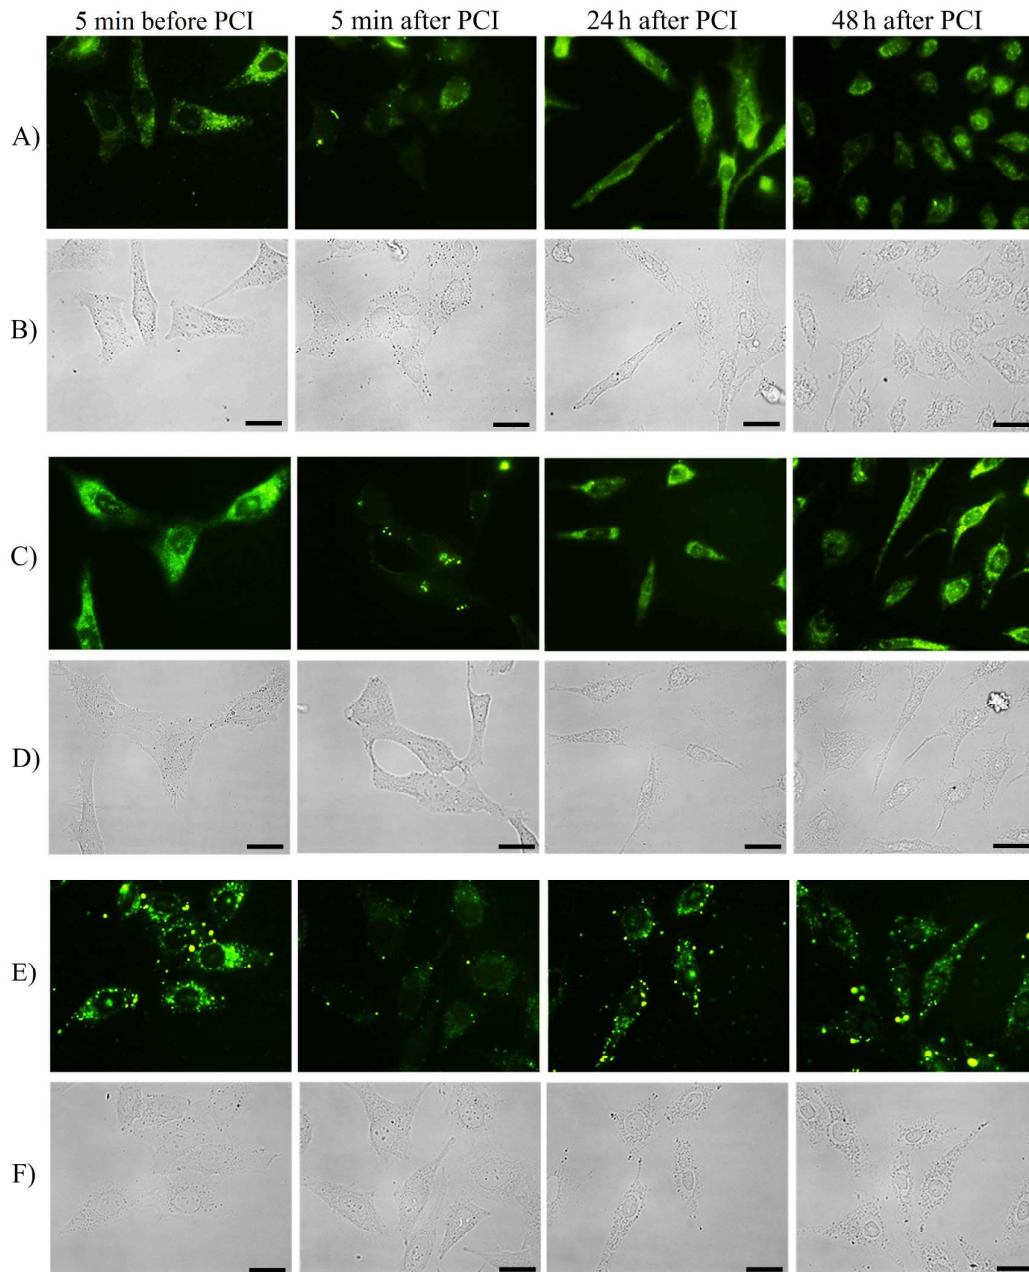

### Supplementary figure S3

24 and 48 h after irradiation at 690 nm nucleolar localization of TuBB-9-FITC can be observed after incubation with all three constructs. HeLa cells were incubated with TuBB-9-FITC constructs 4 h before irradiation. (a) and (b) show L-TuBB-9-FITC, (c) and (d) show NLS-TuBB-9-FITC, (e) and (f) show Pep-1-TuBB-9-FITC. Before PCI means 5min before PCI irradiation after cells incubated 22h with BPD and 4h with TuBB-9-FITC constructs. Size bars: 30  $\mu$ m.

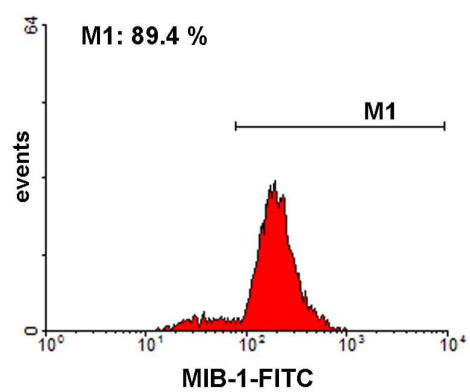

**Supplementary figure S4**

Flow cytometric determination of Ki-67 status in HeLa cells shows that 89.4 % of the cells are positive for Ki-67. As monolayer cultivated HeLa cells were trypsinated and stained with the Ki-67 antibody MIB-1-FITC.
